# Supplementary material
Source: PubMed Central journal article supplement (PMC4472336)
Supplement: NIHMS696481-supplement-Appendix.pdf [file NIHMS696481-supplement-Appendix.pdf]

## **Appendix 1(available online only). Measurements of Hearing Outcomes**

There are multiple methods to assess hearing and studies report their outcomes in a variety of ways. Pure-tone audiometry and speech discrimination scores provide the most direct, clinically applicable information, and are considered the gold standard for evaluating changes in hearing thresholds. Audiometric measures also include OAE and psychophysical measurements, which are described in more detail in the appendices (Appendix 3, 4).

Self-reported hearing loss is clearly not the audiometric gold standard, but may be the most logistically practical option for initial inquiries in large prospective cohorts followed via questionnaire. Some studies suggest that subjective and objective results may correlate reliably,<sup>77,78</sup> but multiple others do not.<sup>77,79,80</sup> In addition, those who seek medical care more frequently may be more likely to both take ASA and have audiometry, which might bias the results. Findings of studies relying on self-reported hearing loss are ideally corroborated by follow up or concomitant formal audiometric measurements.

**Appendix 2 (available online only). Case Reports of Hearing Loss associated with ASA**

| Author, year                | Patient characteristics | ASA regimen evaluated                              | Follow up Time                            | Results with NSAID exposure                                                                                                                                            | Time From Exposure to Outcome | Additional Comments                                                                                                                                                                                |
|-----------------------------|-------------------------|----------------------------------------------------|-------------------------------------------|------------------------------------------------------------------------------------------------------------------------------------------------------------------------|-------------------------------|----------------------------------------------------------------------------------------------------------------------------------------------------------------------------------------------------|
| Janssen, 1999 <sup>27</sup> | 22 year old female      | ASA 10 g at once (overdose suicide attempt)        | 46 hours                                  | Severe high-frequency HL (50 dB notch at 6k Hz) with tinnitus AU.<br>Slope of the DPOAE I/O functions increased with increasing HL revealing decreased OHC compression | 22 hours                      | Reversible: PT thresholds, DPOAE, and TEOAE returned to normal 46 hours after the salicylate was discontinued                                                                                      |
| Jordan, 1991 <sup>28</sup>  | 76 year old male        | ASA 6-7 g/ d                                       | 1 month                                   | Mild to moderate SNHL AU, that improved to normal at 250-2k Hz, sloping moderate SNHL HL, loud roaring tinnitus AU                                                     | NR                            | Reversible: Hearing thresholds were within normal limits up to 2000 Hz and WRS was 100% bilaterally within 1 months of discontinuing ASA                                                           |
| Koegel, 1985 <sup>29</sup>  | 52 year old female      | ASA 2 g/d for “many” months                        | 24 days                                   | Fluctuating moderate SNHL AU, poor word recognition scores AU, aural fullness, unsteadiness, and tinnitus                                                              | Months                        | Reversible: When drug was discontinued hearing thresholds improved to normal and word recognition was excellent bilaterally<br>-Hearing test revealed a flat, symmetrical SNHL approximately 45 dB |
| Jarvis, 1966 <sup>30</sup>  | 19 year old female      | ASA 2-3 tablets Q2h x3d (tablet size not reported) | 3 days and repeated audiograms thereafter | Vertigo, left-sided tinnitus, and left-sided severe SNHL (80-90dB threshold)                                                                                           | 3 days                        | Reversible: significant improvement since ASA was discontinued                                                                                                                                     |
| Ramsden, 1985 <sup>31</sup> | 29 year old male        | 100 ASA tablets (tablet size not reported)         | 4 hours                                   | SNHL (30 dB), bilateral tinnitus, and slight imbalance.<br>ECochG: biphasic recruiting action potentials                                                               | 4 hours                       | Reversible: following 24 h of forced alkaline diuresis, SNHL returned to normal, ECochG had a normal configuration, subjective tinnitus improvement                                                |
|                             | 36 year old female      | ~20-40 ASA tablets (tablet size not reported)      | 2 hours                                   | Bilateral symmetric moderate-severe SNHL (50 dB)<br>ECochG: biphasic recruiting action potentials                                                                      | 2 hours                       | Reversible: hearing returned to normal and tinnitus disappeared 24-48 hours following cessation of ASA.                                                                                            |

|                              |                    |             |    |                                                                                                                                                                                                                                                                                            |    |                                                                                           |
|------------------------------|--------------------|-------------|----|--------------------------------------------------------------------------------------------------------------------------------------------------------------------------------------------------------------------------------------------------------------------------------------------|----|-------------------------------------------------------------------------------------------|
| Naganawa, 2009 <sup>32</sup> | 61 year old female | 100mg/d ASA | NR | Sudden left-sided SNHL (80 dB) and aural fullness and severe vertigo<br>Normal CT scans of temporal bone.<br>MRI scans negative for vestibular schwannoma and malformation of the inner ear.<br>MRI scans revealed possible hemorrhage in the ampullar endolymph of the semicircular canal | NR | Irreversible: patient reported no improvement in hearing following oral steroid treatment |
|------------------------------|--------------------|-------------|----|--------------------------------------------------------------------------------------------------------------------------------------------------------------------------------------------------------------------------------------------------------------------------------------------|----|-------------------------------------------------------------------------------------------|

None of the patients in these case reports were described as having rheumatoid arthritis or connective tissue diseases at baseline.

**Appendix 3 (available online only). Studies of the Impact of ASA on Otoacoustic Emissions**

| Author, year               | Study Design (Sample Size)                                                            | Patient Description                                                                                                                                           | ASA regimen evaluated                          | Hearing Evaluation                                                                                                                                      | Follow up Time                                                    | NSAID Exposure Results                                                                                                                                                                                                                  | No NSAID Exposure Results                                                                                  | Time From Exposure to Outcome           | Additional Comments                                                                                            |
|----------------------------|---------------------------------------------------------------------------------------|---------------------------------------------------------------------------------------------------------------------------------------------------------------|------------------------------------------------|---------------------------------------------------------------------------------------------------------------------------------------------------------|-------------------------------------------------------------------|-----------------------------------------------------------------------------------------------------------------------------------------------------------------------------------------------------------------------------------------|------------------------------------------------------------------------------------------------------------|-----------------------------------------|----------------------------------------------------------------------------------------------------------------|
| Brown, 1993 <sup>76</sup>  | Prospective Placebo-controlled, Double-blind Crossover Study (n=8)                    | Age 19-34 years with normal hearing at the outset<br>Male healthy volunteers                                                                                  | ASA 3x 320 mg Q6h x24 hrs (a total of 8 doses) | Stimulus frequency emission: level of cubic distortion when the distortion frequency falls a half octave below that of the higher of two stimulus tones | 1x/ week over 4 weeks: baseline, ASA, placebo, and post-trial     | 3 subjects: downward shift of Fc of distortion peak by up to 200 Hz<br>2 subjects: shift in distortion peak was not associated with a change in psychophysical threshold.                                                               | The placebo results were used as the baseline for comparison to the crossover data from the ASA ingestion. | Serial effect measurements at 1-4 weeks | ASA affects the resonance frequency of the bandpass filter revealed by distortion measurement, but not tuning. |
| Abdala, 2005 <sup>23</sup> | Prospective Cohort (n=41, 10 of which were ASA-exposed, 9 completed the entire study) | Adult ASA recipients: Age 22-37 years (mean 29.1)<br>4 left ears<br>6 right ears (n=10)<br>Children with mild SNHL (n=8)<br>Healthy term-born neonates (n=23) | 325 mg ASA Q6h for 4 d                         | DPOAE: suppression growth, threshold, saturation, slope of the I/O function                                                                             | Baseline, then 72h and 96h after beginning the salicylate regimen | DPOAE mean amplitude reduced by 3.8 dB at 1500 Hz and 7.6 dB at 6000 Hz 96h after ASA. ASA systematically altered DPOAE suppression in adults at 6000 Hz, but not at 1500 Hz. No significant correlation between serum level and DPOAE. | Subjects were compared to their own baseline                                                               | 72, 96h                                 | Post-ASA DPOAE did not mimic infant findings                                                                   |

|                                          |                           |                                               |                                                    |                                                                                                                              |                                                                                        |                                                                                                                                                                                                                        |                                              |             |                                                                                                                                        |
|------------------------------------------|---------------------------|-----------------------------------------------|----------------------------------------------------|------------------------------------------------------------------------------------------------------------------------------|----------------------------------------------------------------------------------------|------------------------------------------------------------------------------------------------------------------------------------------------------------------------------------------------------------------------|----------------------------------------------|-------------|----------------------------------------------------------------------------------------------------------------------------------------|
| Parazzini, 2005 <sup>41</sup>            | Prospective Cohort (n=12) | Age 19-38 years healthy males                 | ASA 975 mg BID x1d, QID x2d, BID x1d in this order | HTL= > 20 dB at 250-8000 Hz and DPOAE                                                                                        | 2d before exposure, during exposure, 2d after exposure                                 | 7-21.5 dB temporary sensory threshold shift after ASA DPOAE phase gradient was increased with ASA, steeper phase gradients found in higher frequencies with no significant phase gradient effect in lower frequencies. | Subjects were compared to their own baseline | NR          | DPOAE phase gradient and amplitude and hearing thresholds were increased by ASA consumption and did not recover after cessation of ASA |
| McFadden, Plattsmier, 1984 <sup>46</sup> | Prospective Cohort (n=5)  | Male volunteers with normal hearing and SOAEs | ASA 975 mg QID x4d                                 | Auditory sensitivity evaluated with adaptive, two-interval forced choice at 500 and 3500 Hz SOAE < 6dB above the noise floor | Subjects were seen at least once a day during the exposure and then 2-3 days afterward | 4.3-17.5dB worsening in threshold after ASA 60% (3/5) Smaller SOAEs disappeared after 14-20 hours and larger SOAEs disappeared after several days.                                                                     | Subjects were compared to their own baseline | 14-24 hours | Full recovery of SOAEs was seen at 24-48h in some subjects.                                                                            |

|                             |                                      |                                                    |                                                                                    |                                                                                                                                                               |                                                                                                                                                    |                                                                                                                                                                                                                                                                        |                                                       |                                |                                                                                                                                                                                                                                                                               |
|-----------------------------|--------------------------------------|----------------------------------------------------|------------------------------------------------------------------------------------|---------------------------------------------------------------------------------------------------------------------------------------------------------------|----------------------------------------------------------------------------------------------------------------------------------------------------|------------------------------------------------------------------------------------------------------------------------------------------------------------------------------------------------------------------------------------------------------------------------|-------------------------------------------------------|--------------------------------|-------------------------------------------------------------------------------------------------------------------------------------------------------------------------------------------------------------------------------------------------------------------------------|
| Long<br>1988 <sup>42</sup>  | Prospective<br>Cohort<br>(n=4)       | 1 male, 3<br>female                                | ASA 325<br>mg Q6h x3-<br>4d                                                        | Less than the<br>noise floor<br>(-10 dB SPL at<br>1300 and<br>1400Hz and -<br>6.5 dB SPL at<br>1000 and 2000<br>Hz)<br><br>Spontaneous,<br>delayed-<br>evoked | 1d before<br>exposure,<br>“several”<br>times/d<br>during first<br>days, 2x/d in<br>the middle<br>of ASA, and<br>“several”<br>times/d<br>afterwards | All SOAE<br>(except 1 from<br>GD's ear) were<br>reduced to the<br>noise floor<br>(quantification<br>not reported)<br>within 2 days<br>of ASA<br>-Increased<br>sensitivity of<br>evoked OAEs<br>seen in all 3<br>subjects                                               | Subjects were<br>compared to<br>their own<br>baseline | 2 days                         |                                                                                                                                                                                                                                                                               |
| Rao, 2011<br><sup>43</sup>  | Prospective<br>Cohort<br>(n=3)       | Age 20-30<br>years                                 | ASA 325mg<br>Q6h x 3 d                                                             | DPOAE                                                                                                                                                         | 24h prior to<br>exposure,<br>then 18h,<br>34h, 40h,<br>58h, 66h,<br>114h after<br>first dose of<br>ASA                                             | Reduced<br>responses were<br>seen 18-34h<br>after exposure.<br>The reflective<br>component<br>was more<br>susceptible<br>than the<br>nonlinear.                                                                                                                        | Subjects were<br>compared to<br>their own<br>baseline | 18-34h                         | Partial results<br>obtained for subject 3<br>due to fewer<br>measurements                                                                                                                                                                                                     |
| Wier, 1989<br><sup>44</sup> | Prospective<br>Cohort study<br>(n=4) | All males<br>with one or<br>more reliable<br>SOAEs | ASA 3x<br>325mg<br>every 6<br>hours for up<br>to 4 days<br><br>Daily dose:<br>3.9g | All subjects<br>had $\geq 1$ reliable<br>SOAE                                                                                                                 | Every 24 h<br>until the<br>SOAE<br>became<br>unmeasurable<br>or 4 days<br>at the most.                                                             | SOAEs greatly<br>reduced or<br>eliminated;<br>EDPs reduced<br>but not<br>eliminated.<br><br>SOAE<br>threshold<br>shifts ranged<br>from (-1.6) –<br>(+4.8) dB<br><br>Primaries used<br>to generate<br>EDPs’<br>threshold<br>shifts ranged<br>from (-6.6) –<br>(+9.3) dB | Subjects were<br>compared to<br>their own<br>baseline | Effect<br>present at<br>24-48h | EDP and SOAE<br>amplitudes returned<br>to within 3 dB of<br>baseline values 48 h<br>after last aspirin dose<br>for 3 subjects. The<br>4th subject’s EDP<br>returned to within 2<br>dB of baseline 24 h<br>and SOAE returned<br>after 1 week<br>following last aspirin<br>dose |

|                          |                          |                |                    |                                                                                              |        |                                               |                                              |    |                                                                  |
|--------------------------|--------------------------|----------------|--------------------|----------------------------------------------------------------------------------------------|--------|-----------------------------------------------|----------------------------------------------|----|------------------------------------------------------------------|
| Hall, 2001 <sup>45</sup> | Prospective Cohort (n=9) | Normal hearing | ASA 11.7g over 72h | TEOAEs were measured at 50, 60, 60, and 80 dB SPL.<br><br>Self-recording audiometry at 3k Hz | 7 days | Threshold shift at 3 kHz ranged from 0-14 dB. | Subjects were compared to their own baseline | NR | TEOAE reduction in amplitude at 3k Hz was greatest at 80 dB SPL. |
|--------------------------|--------------------------|----------------|--------------------|----------------------------------------------------------------------------------------------|--------|-----------------------------------------------|----------------------------------------------|----|------------------------------------------------------------------|

### *Impact of Aspirin on Otoacoustic Emissions*

Eight small studies evaluated the impact of ASA on OAEs: 1 prospective placebo-controlled, double-blinded crossover study<sup>40</sup> and 7 prospective cohort studies.<sup>23,41-46.</sup>

The prospective, placebo-controlled, double-blind crossover study evaluated adult male volunteers (n=8, age 19-34y) with threshold audiogram at 1-8kHz, distortion audiogram ( $f2/f1 = 1.225$ ,  $f2 = 1-8\text{kHz}$  in one-third octave steps,  $L1 = 55/ L2 = 40$  dB SPL), spontaneous OAEs (1-5 kHz),  $f1$  sweep ( $f2$  fixed at 40 dB SPL, 4 kHz, while  $f1$  55 dB SPL swept from 2.83 to 3.960 kHz), and a stimulus frequency emission spectrum (single tone at 40 dB SPL swept between 1600-4000Hz). Equivalent rectangular bandwidth (ERB) for each subject was also calculated from the psychophysical data obtained.<sup>40</sup> Adult subjects participated in four conditions: pre-trial screening, ASA, placebo, and post-trial evaluation. Large variation existed among subjects; however, in 38% (3/8) of subjects, ASA created a downward shift of up to 200 Hz in the peak frequency of the bandpass filter. There was no evidence of a downward shift in the frequency of the fine structure that could explain the frequency shift noted in the distortion frequency sweeps, suggesting that the bandpass filter was not affected by the mechanism responsible for the “fine structure” in the SFE spectrum. The

outcomes of this study suggested a link between the tuning of the distortion peak and psychophysically measured equivalent rectangular bandwidth (ERB).

Among the largest of OAE-focused reports was a prospective cohort study (n = 41) conducted at the House Ear Institute.<sup>23</sup> ASA-exposed adults were compared to their own otologically normal baseline. Hearing was assessed with spontaneous otoacoustic emissions (SOAE), distortion product otoacoustic emissions (DPOAE), suppression tuning curves, the DPOAE I/O function at both  $f_2 = 1500$  Hz and 6000 Hz, air and bone conduction pure-tone thresholds, DP-gram ( $f_2 = 1500 - 12,500$  Hz), and immittance tympanometry (226 Hz probe tone). An  $f_2 / f_1$  ratio of 1.21 with primary tones was presented at 65/55 dB SPL for suppression measurements. ASA exposure (975 mg Q6h x 24h) resulted in a reduction in DPOAE mean amplitude by 3.8 dB at 1500 Hz and 7.6 dB at 6000 Hz 96h post-exposure (p=0.001). ASA suppressed the iso-suppression tuning curves in adults at 6000 Hz (mean  $Q_{10}$  shifted from 2.38 during baseline to 1.56 when measured four days after start of ASA, p=0.05), but not at 1500 Hz. Audiometric thresholds were increased by a mean of 12.7 dB at 1500 Hz and by 14.3 dB at 6000 Hz 96h after initial consumption.

The remainders of the studies were small prospective cohorts, in which ASA was administered in doses ranging from 1.3 – 3.9 g/d and subjects' post-ASA results were compared to their own baseline.<sup>41,42,43,44,45,46</sup> All showed deterioration in OAE measurements after ASA administration.

OAEs describe an objective assessment of cochlear function, specifically the motility of outer hair cells; these measurable sounds are generated and emitted by the ear spontaneously or in response to stimuli. In a normal ear, when sound is presented to the



ear canal via a probe, the organ of Corti vibrates and amplifies the input to the inner hair cells. Spontaneous OAEs (SOAEs) are low-level tones emitted in the absence of any known stimulus that suggest normal cochlear hearing sensitivity at the frequency region of the SOAE. Distortion product OAEs (DPOAEs) are emitted in response to two primary simultaneous pure-tones ( $f_1$  and  $f_2$ ) located at near frequencies and measure the distortion product of non-linear cochlear processing.<sup>81</sup> Generating the intermodulation DPOAE component requires that the ratio of these two primaries ( $f_2/f_1$ ) has an effect on the amplitudes of the DPOAEs at each frequency tested. The most frequently measured DPOAE is at the  $2f_1-f_2$  frequency because it is the largest measurable DPOAE in human ears. Transient evoked otoacoustic emissions (TEOAEs) measure the cochlear response to a transient (click or tone burst) signal, which contains a range of frequencies. DPOAEs are the preferred method when determining ototoxicity effects because they can be measured at higher frequencies than TEOAEs. OAEs can be readily added to an ototoxicity monitoring battery because they are measured rapidly and non-invasively from the outer ear canal, and were utilized in several studies within this systematic review.

**Appendix 4 (available online only). Studies of the Impact of ASA on Psychophysical methods**

| Author, year                                      | Study Design (Sample Size)                                         | Patient Description                             | NSAID evaluated                                                                                                      | Hearing Evaluation                                                                                                                 | Follow up Time                                                                                                                        | NSAID Exposure Results                                                                                                      | No NSAID Exposure Results                                                                                  | Time From Exposure to Outcome   | Additional Comments                                                                                                                                                                                        |
|---------------------------------------------------|--------------------------------------------------------------------|-------------------------------------------------|----------------------------------------------------------------------------------------------------------------------|------------------------------------------------------------------------------------------------------------------------------------|---------------------------------------------------------------------------------------------------------------------------------------|-----------------------------------------------------------------------------------------------------------------------------|------------------------------------------------------------------------------------------------------------|---------------------------------|------------------------------------------------------------------------------------------------------------------------------------------------------------------------------------------------------------|
| Beveridge, 1996 <sup>49</sup>                     | Prospective Placebo-controlled, Double-blind Crossover Study (n=9) | Age 20-32 years<br>Male healthy volunteers      | Three ASA 320 mg or Placebo Q6h x3d (3.84 g/day), with a washout period of at least 1 week                           | Compared differences between variation of signal rather than masker level and broad band versus narrowband maskers                 | 1h, 1 week after final dose                                                                                                           | ASA significantly elevated the tips and reduced the slopes of the PTCs, indicating a reduction in frequency selectivity     | The placebo results were used as the baseline for comparison to the crossover data from the ASA ingestion. | Effect present at 1h and 1 week | Psychophysical testing showed a reduction in frequency selectivity, which may affect one's ability to understand speech in noise                                                                           |
| Carlyon, 1993 <sup>48</sup>                       | Prospective Placebo-controlled, Double-blind Crossover Study (n=8) | All male<br>Age 19-34 years with normal hearing | Three ASA 320 mg or Placebo Q6h (3.84g/d) x8 doses                                                                   | Auditory filter shapes in notched-noise forward masking from thresholds that were obtained by adaptively varying the signal level. | 1. After subjects had consumed 8x 320 mg ASA Q6h<br>2. After 8x 320 mg placebo Q6h<br>3. 1w after initial (1,2) testing was completed | ASA significantly broadened the filter shapes                                                                               | The placebo results were used as the baseline for comparison to the crossover data from the ASA ingestion. | NR                              | Psychophysical testing<br>Modest dosage of aspirin can cause a decrease in frequency selectivity, which may affect one's ability to understand speech in noise.<br>Some subject overlap with reference 72. |
| McFadden, Plattsmier, Pasanen, 1984 <sup>75</sup> | Prospective Crossover Study (n=11)                                 | 11 males, 19-23 years old with normal hearing   | ASA 3.9g daily x4d<br><br>All sessions with intensity necessary for 10 minutes 2500 Hz tone to produce ~12 dB of TTS | >5 dB shift in audiometric thresholds, as measured by a two-interval forced choice method                                          | 4 days                                                                                                                                | ASA with exposure to intense noise produced HL ~10-15 dB greater than that produced by exposure to the intense sound alone. | Subjects were compared to their own baseline and to their own performance in other drug regimens           | 2.8 minutes                     | Moderate doses of ASA may increase risk of hearing loss.                                                                                                                                                   |

|                                                   |                           |                                                                                                      |                                |                                                                                   |                                                                       |                                                                                                                                                                                                 |                                              |                                         |                                                                                               |
|---------------------------------------------------|---------------------------|------------------------------------------------------------------------------------------------------|--------------------------------|-----------------------------------------------------------------------------------|-----------------------------------------------------------------------|-------------------------------------------------------------------------------------------------------------------------------------------------------------------------------------------------|----------------------------------------------|-----------------------------------------|-----------------------------------------------------------------------------------------------|
| Bonding, 1979 <sup>24</sup>                       | Prospective Cohort (n=21) | 4 males, 12 females<br>Age 16-29 years with normal hearing<br><br>Control: 5 normal hearing subjects | ASA 4g every 24 h              | Control Audiometry and CB estimations using loudness summation                    | Audiometric testing was performed 2-3 weeks after HL developed        | 15-40 dB HL at 1k Hz<br><br>56% (9/16) had a wider CB with temporary ASA induced HL                                                                                                             | Subjects compared to their own baseline      | Effect present after 2-3 d of treatment | Reversible                                                                                    |
| McFadden, Plattsmier, Pasanen, 1984 <sup>46</sup> | Prospective Cohort (n=5)  | 5 males, college age, hearing thresholds were within 15 dB HL from 250-8000 Hz at the outset         | ASA 3.9 g/d, mg q6h for 5 days | Forward masking and gap detection were compared to individual "baseline" findings | ~21 hrs, ~45 hrs, ~69 hrs, ~93 hrs, and ~117 hrs after the first dose | In 3 psychophysical tasks, subjects taking a moderate dose of ASA perform differently from their own normal performance, similarly to the ways normal and SNHL listeners differ on these tasks. | Subjects were compared to their own baseline | 1-3 days                                | Psychophysical: Performance in forward-masking, temporal-integration, and gap-detection tasks |

### *Impact of ASA on Psychophysical Measurements*

Five prospective studies assessed the impact of ASA on psychophysical measurements, all of which suggested an adverse effect on hearing. A prospective, double-blind crossover study evaluated healthy adult male volunteers (n=9) after either 3.84g/d ASA or placebo for 3 days (washout 1 week).<sup>49</sup> The impact of ASA on psychophysical tuning curves (PTC) was assessed by comparing differences in variation of the signal level rather than the masker level and broadband versus narrowband maskers, using a forced-choice adaptive procedure with a 2 dB step size. ASA elevated the peaks and significantly reduced the slopes of PTCs ( $p < 0.01$ ), thus

indicating an ASA-induced reduction in frequency selectivity. A second small placebo-controlled double-blinded crossover study evaluated the impact of the same dose of ASA on otologically normal male adults' (n=8) auditory filter shapes in notched-noise forward masking (obtained by adaptively varying the signal level).<sup>48</sup> ASA resulted in a broadened auditory filter shape. Both of these studies suggest that 3.84g/d of ASA may cause a decrease in frequency selectivity, which may impair the perception of speech against background noise. Additionally, 3 small, prospective studies without placebo controls also demonstrated an adverse effect of ASA on psychophysical results when administered at a dose of 3.9-6.8g/d.<sup>24,47,36</sup>

Psychophysical or psychoacoustic testing is a subjective measurement of how a person perceives differences in a physical sound stimulus. For example, insufficiencies in auditory processing may be due problems with the natural compression found in the cochlea. The normal auditory system is compressive; while an impaired auditory system is non-compressive.<sup>82</sup> Psychophysical testing may not be as reliable as standard audiometry due to its intrinsic subjectivity; this testing also relies on the subject's ability to provide full attention to the task given and subjectively judge the correct forced-choice response.

**Table Abbreviations**

ASA: acetylsalicylic acid (aspirin)  
BCDSP: Boston Collaborative Drug Surveillance Program  
BMI: body mass index  
BPD: bronchopulmonary dysplasia  
BSL: blood serum level  
CAPD: continuous ambulatory peritoneal dialysis  
CB: critical band  
Cf: center frequency  
CI: cochlear implant  
CVD: cardiovascular disease  
D: days  
DFMO: difluoromethylornithine  
DPOAE: distortion product otoacoustic emissions  
EDP: evoked distortion product  
ESRD: end stage renal disease  
GI: gastrointestinal  
H: hours  
HL: hearing loss  
HR: Hazard ratios using Cox proportional hazards regression models  
HTL: hearing threshold levels  
HTN: hypertension  
Hx: history  
IV: intravenously  
NICU: neonatal intensive care unit  
NR: not recorded  
PAN: Polyarteritis Nodosa  
Pt: patient  
PT: pure tone  
PTA: pure-tone average  
RA: rheumatoid arthritis  
ROP: retinopathy  
RR: relative risk  
SDS: speech discrimination scores  
SNR: signal to noise ratio  
SOAE: spontaneous otoacoustic emission  
SRT: speech reception threshold  
TEOAE: Transient evoked otoacoustic emissions  
W: weeks  
Y= years

## References

77. Gomez MI, Hwang SA, Sobotova L, Stark AD, May JJ. A comparison of self-reported hearing loss and audiometry in a cohort of New York farmers. *J Speech Lang Hear Res.* 2001;44:1201-1208.
78. Nondahl DM, Cruickshanks KJ, Wiley TL, Tweed TS, Klein R, Klein BE. Accuracy of self-reported hearing loss. *Audiology.* 1998;37:295-301.
79. McCullagh MC, Raymond D, Kerr MJ, Lusk SL. Prevalence of hearing loss and accuracy of self-report among factory workers. *Noise Health.* 2011;13:340-347.
80. Kemp DT. Otoacoustic emissions, travelling waves and cochlear mechanisms. *Hear Res.* 1986;22:95-104.
81. Robles L, Ruggero MA. Mechanics of the mammalian cochlea. *Physiol Rev.* 2001;81:1305-1352.
